# Supplementary material
Source: PubMed Central journal article supplement (PMC6111181)
Supplement: rspb20181246supp1.pdf [file rspb20181246supp1.pdf]

## 1 **Supplementary figures**

2

3 Figure S1: Boxplots of percentage of total sequence reads mapping to the house sparrow  
4 reference genome.

5 Figure S2: PCA of allelic frequencies (as in Fig 1B) but showing within-species  
6 population structuring instead of among species.

7 Figure S3: Cross-validation of ADMIXTURE runs shows highest support for  $K = 2$  & 3.

8 Figure S4: Violin plots show the distribution of pairwise genome-wide  $F_{ST}$  estimates  
9 from 100 Kb sliding windows with a 25 Kb step among and within species.

10 Figure S5: Genome-wide  $F_{ST}$  patterns across all chromosomes from a 100 Kb sliding  
11 windows with a 25 Kb step. Black lines represent house vs. Bactrianus, blue lines denote  
12 Spanish vs. Bactrianus and red lines show House vs. Spanish.

13 Figure S6: Violin plots showing the distribution of pairwise genome-wide  $d_{XY}$  (a) and  $f_d$   
14 (b) estimates from 100 Kb sliding windows with a 25 Kb step among and within species.

15 Figure S7: Demographic models of isolation, migration and admixture tested using site-  
16 frequency spectrum methods. Bottom panel shows migration parameters included in  
17 the models when intraspecific gene flow is allowed.

18 Figure S8: Log-likelihood distributions derived from 1,000,000 coalescent simulations  
19 for each of the demographic models. These distributions provide a means of  
20 distinguishing different scenarios independent of AIC and standard model selection.

21 Figure S9: Genome-wide plot of iHS across the house sparrow genome. The full dataset  
22 has been downsampled to 20% (176, 701 SNPs) in order to aid visualisation. Dashed  
23 horizontal line represents significance at the level of  $P = 0.001$ .

24 Figure S10: Closer examination of genomic divergence between house and Bactrianus  
25 sparrows for chromosomes 1, 2, 3 & 8 where the strongest signatures of selective  
26 sweeps were observed. For each chromosome, top panel –  $\log_{10}(p)$  xpEHH (blue =  
27 background, red = outliers where  $P < 0.0001$ ); second panel – mean absolute nucleotide  
28 divergence ( $d_{XY}$ ); third panel – relative differentiation ( $F_{ST}$ ); fourth panel – proportion of  
29 putatively introgressed sites per 100 Kb window ( $f_d$ ) between the house and Spanish  
30 sparrow.

31

32

33

Percentage reads mapped to House reference

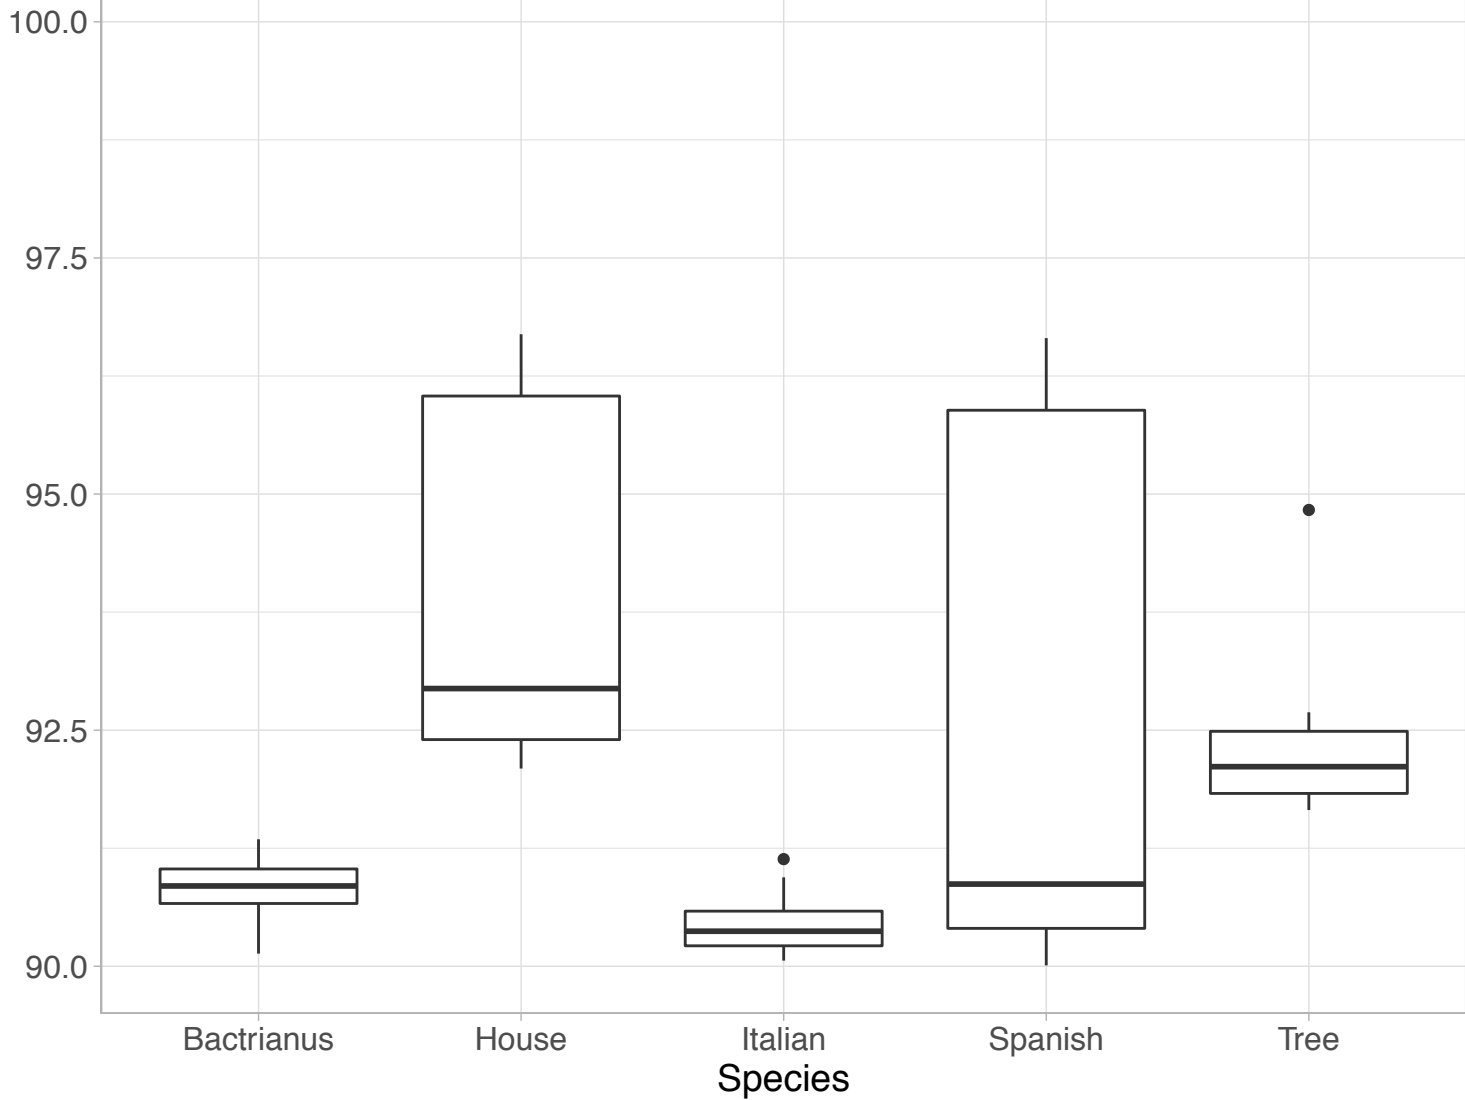

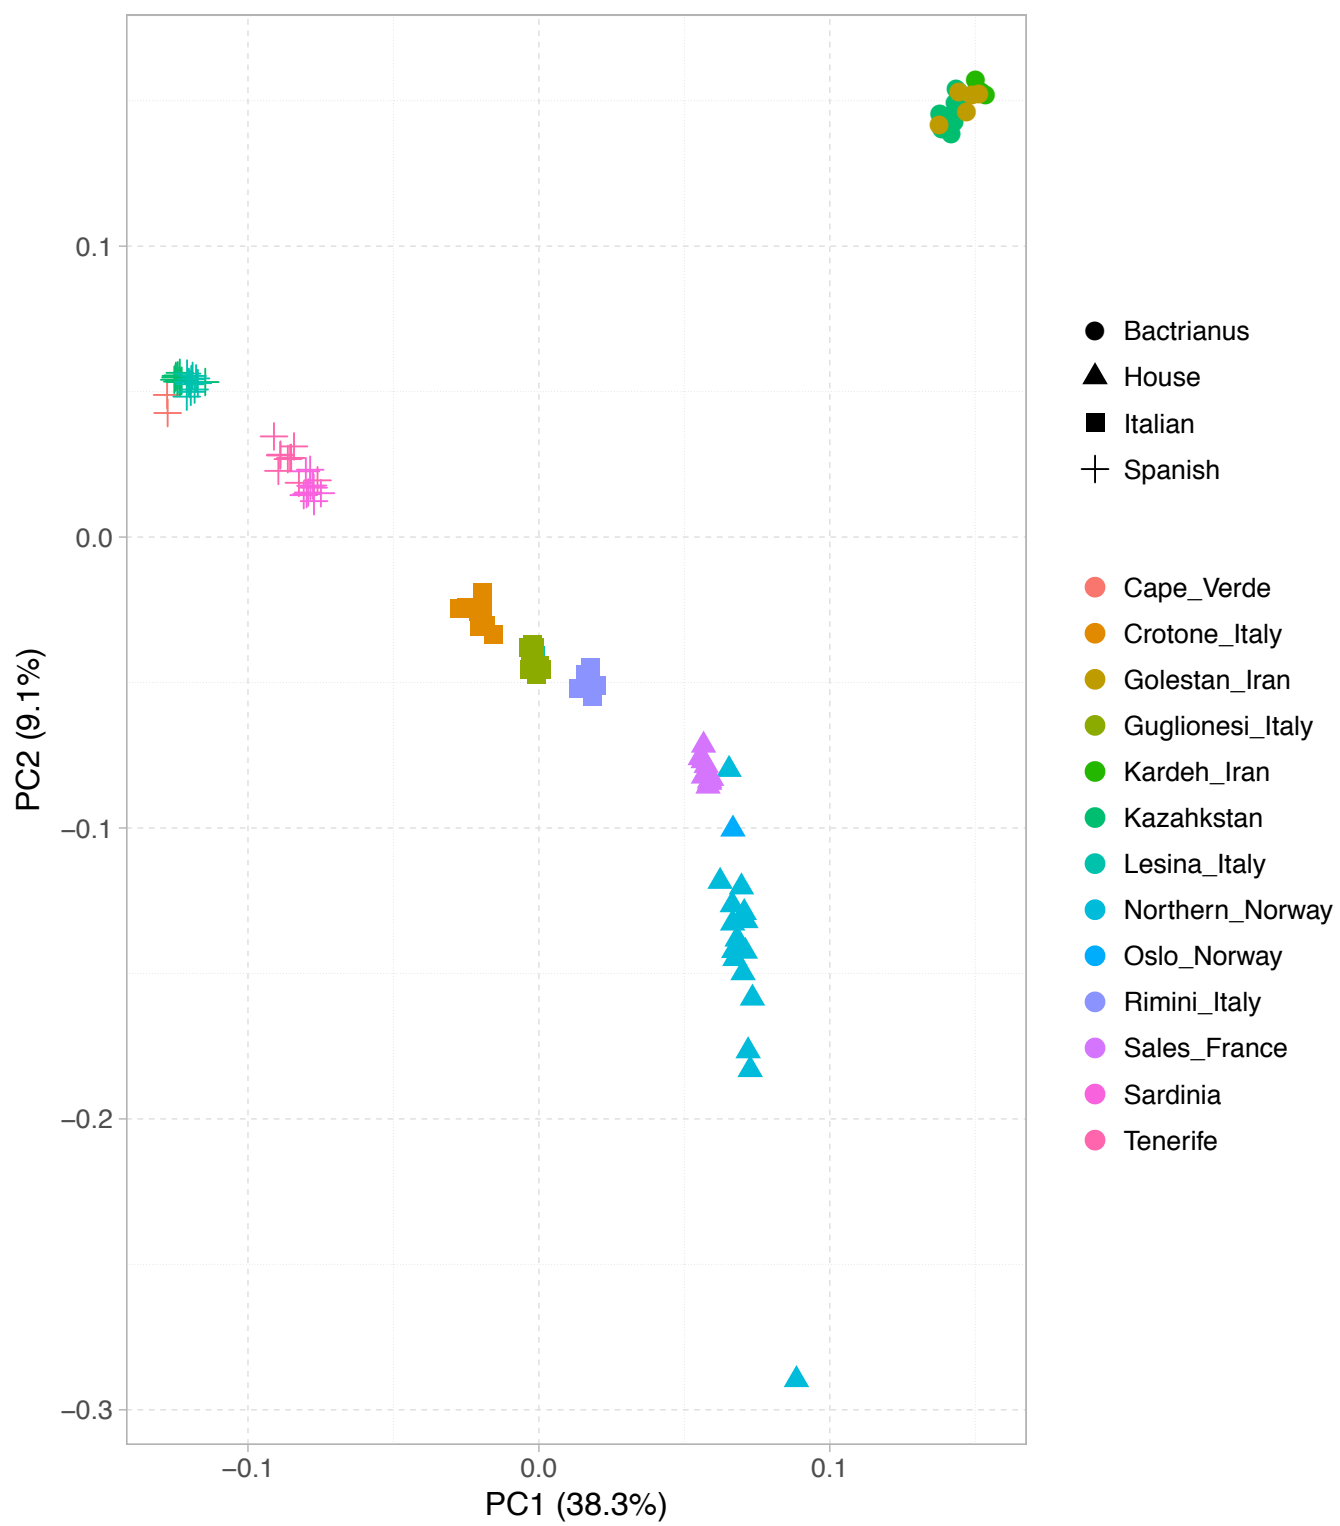

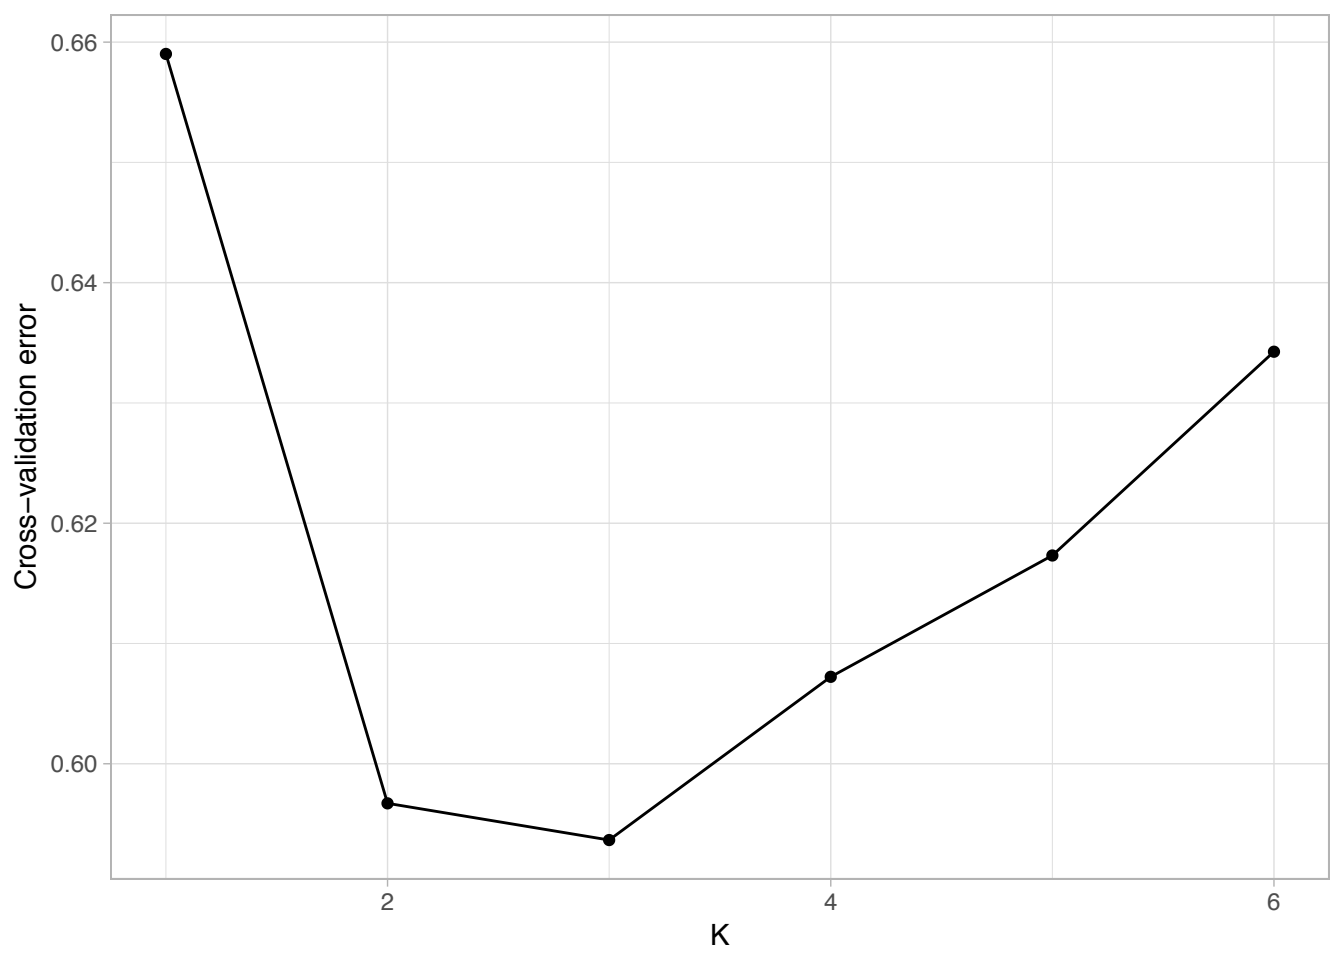

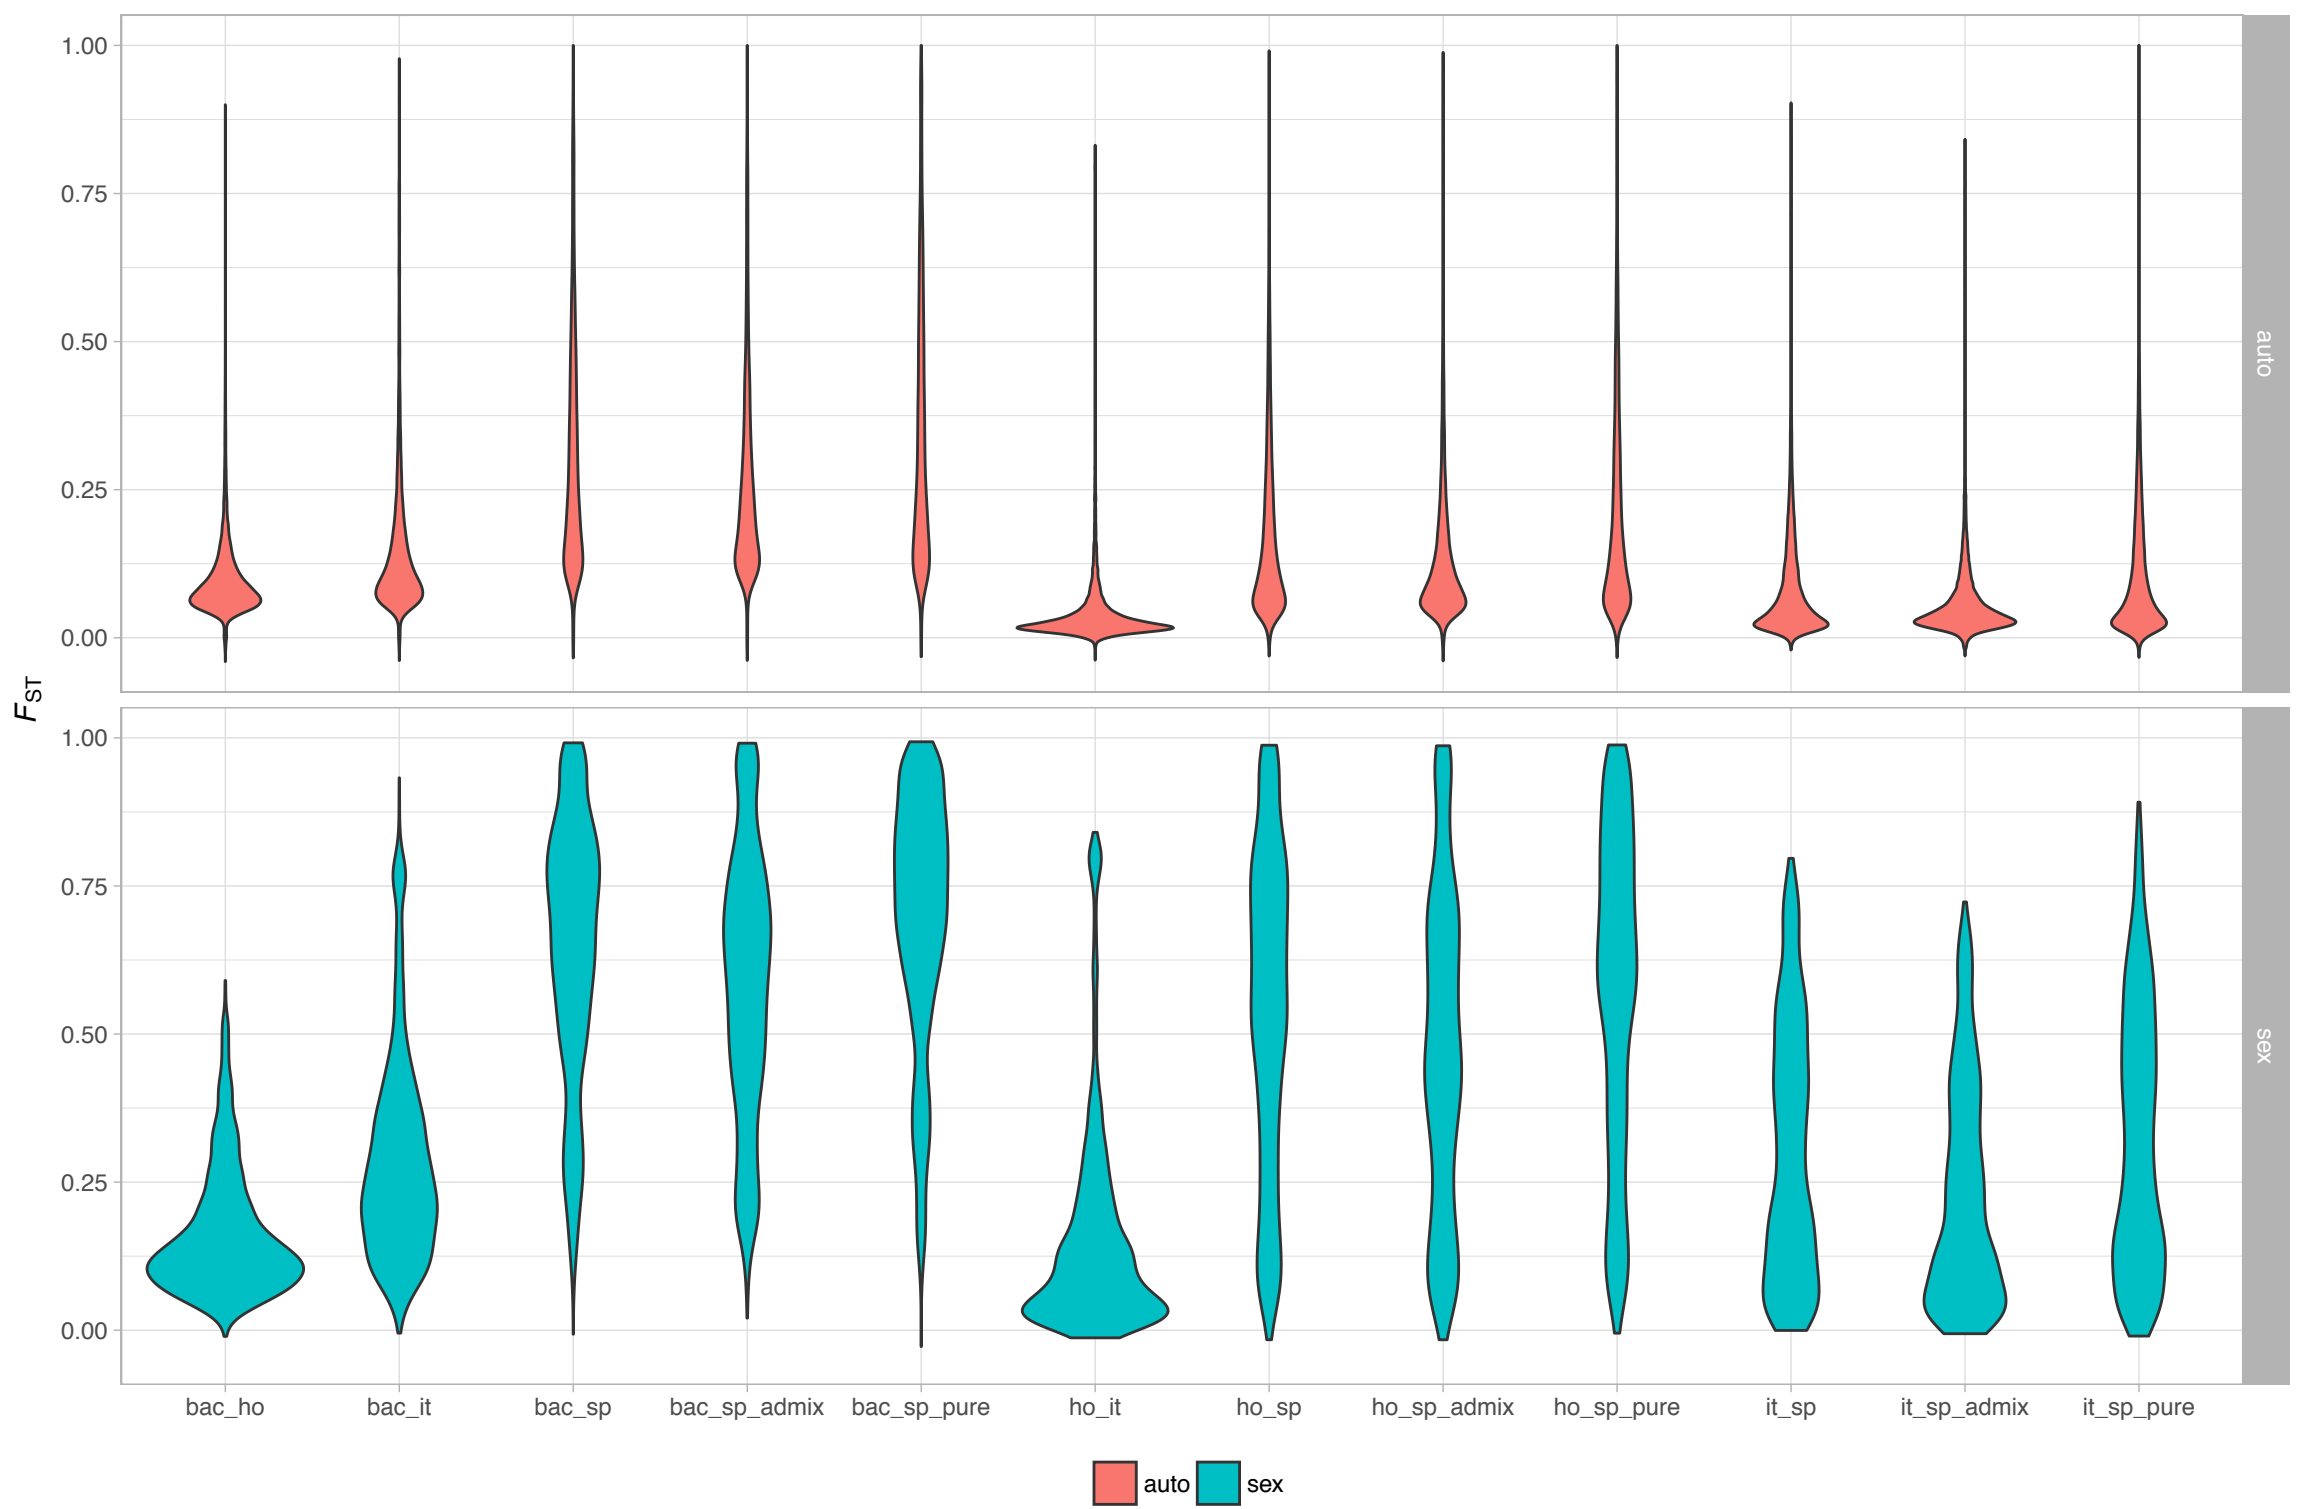

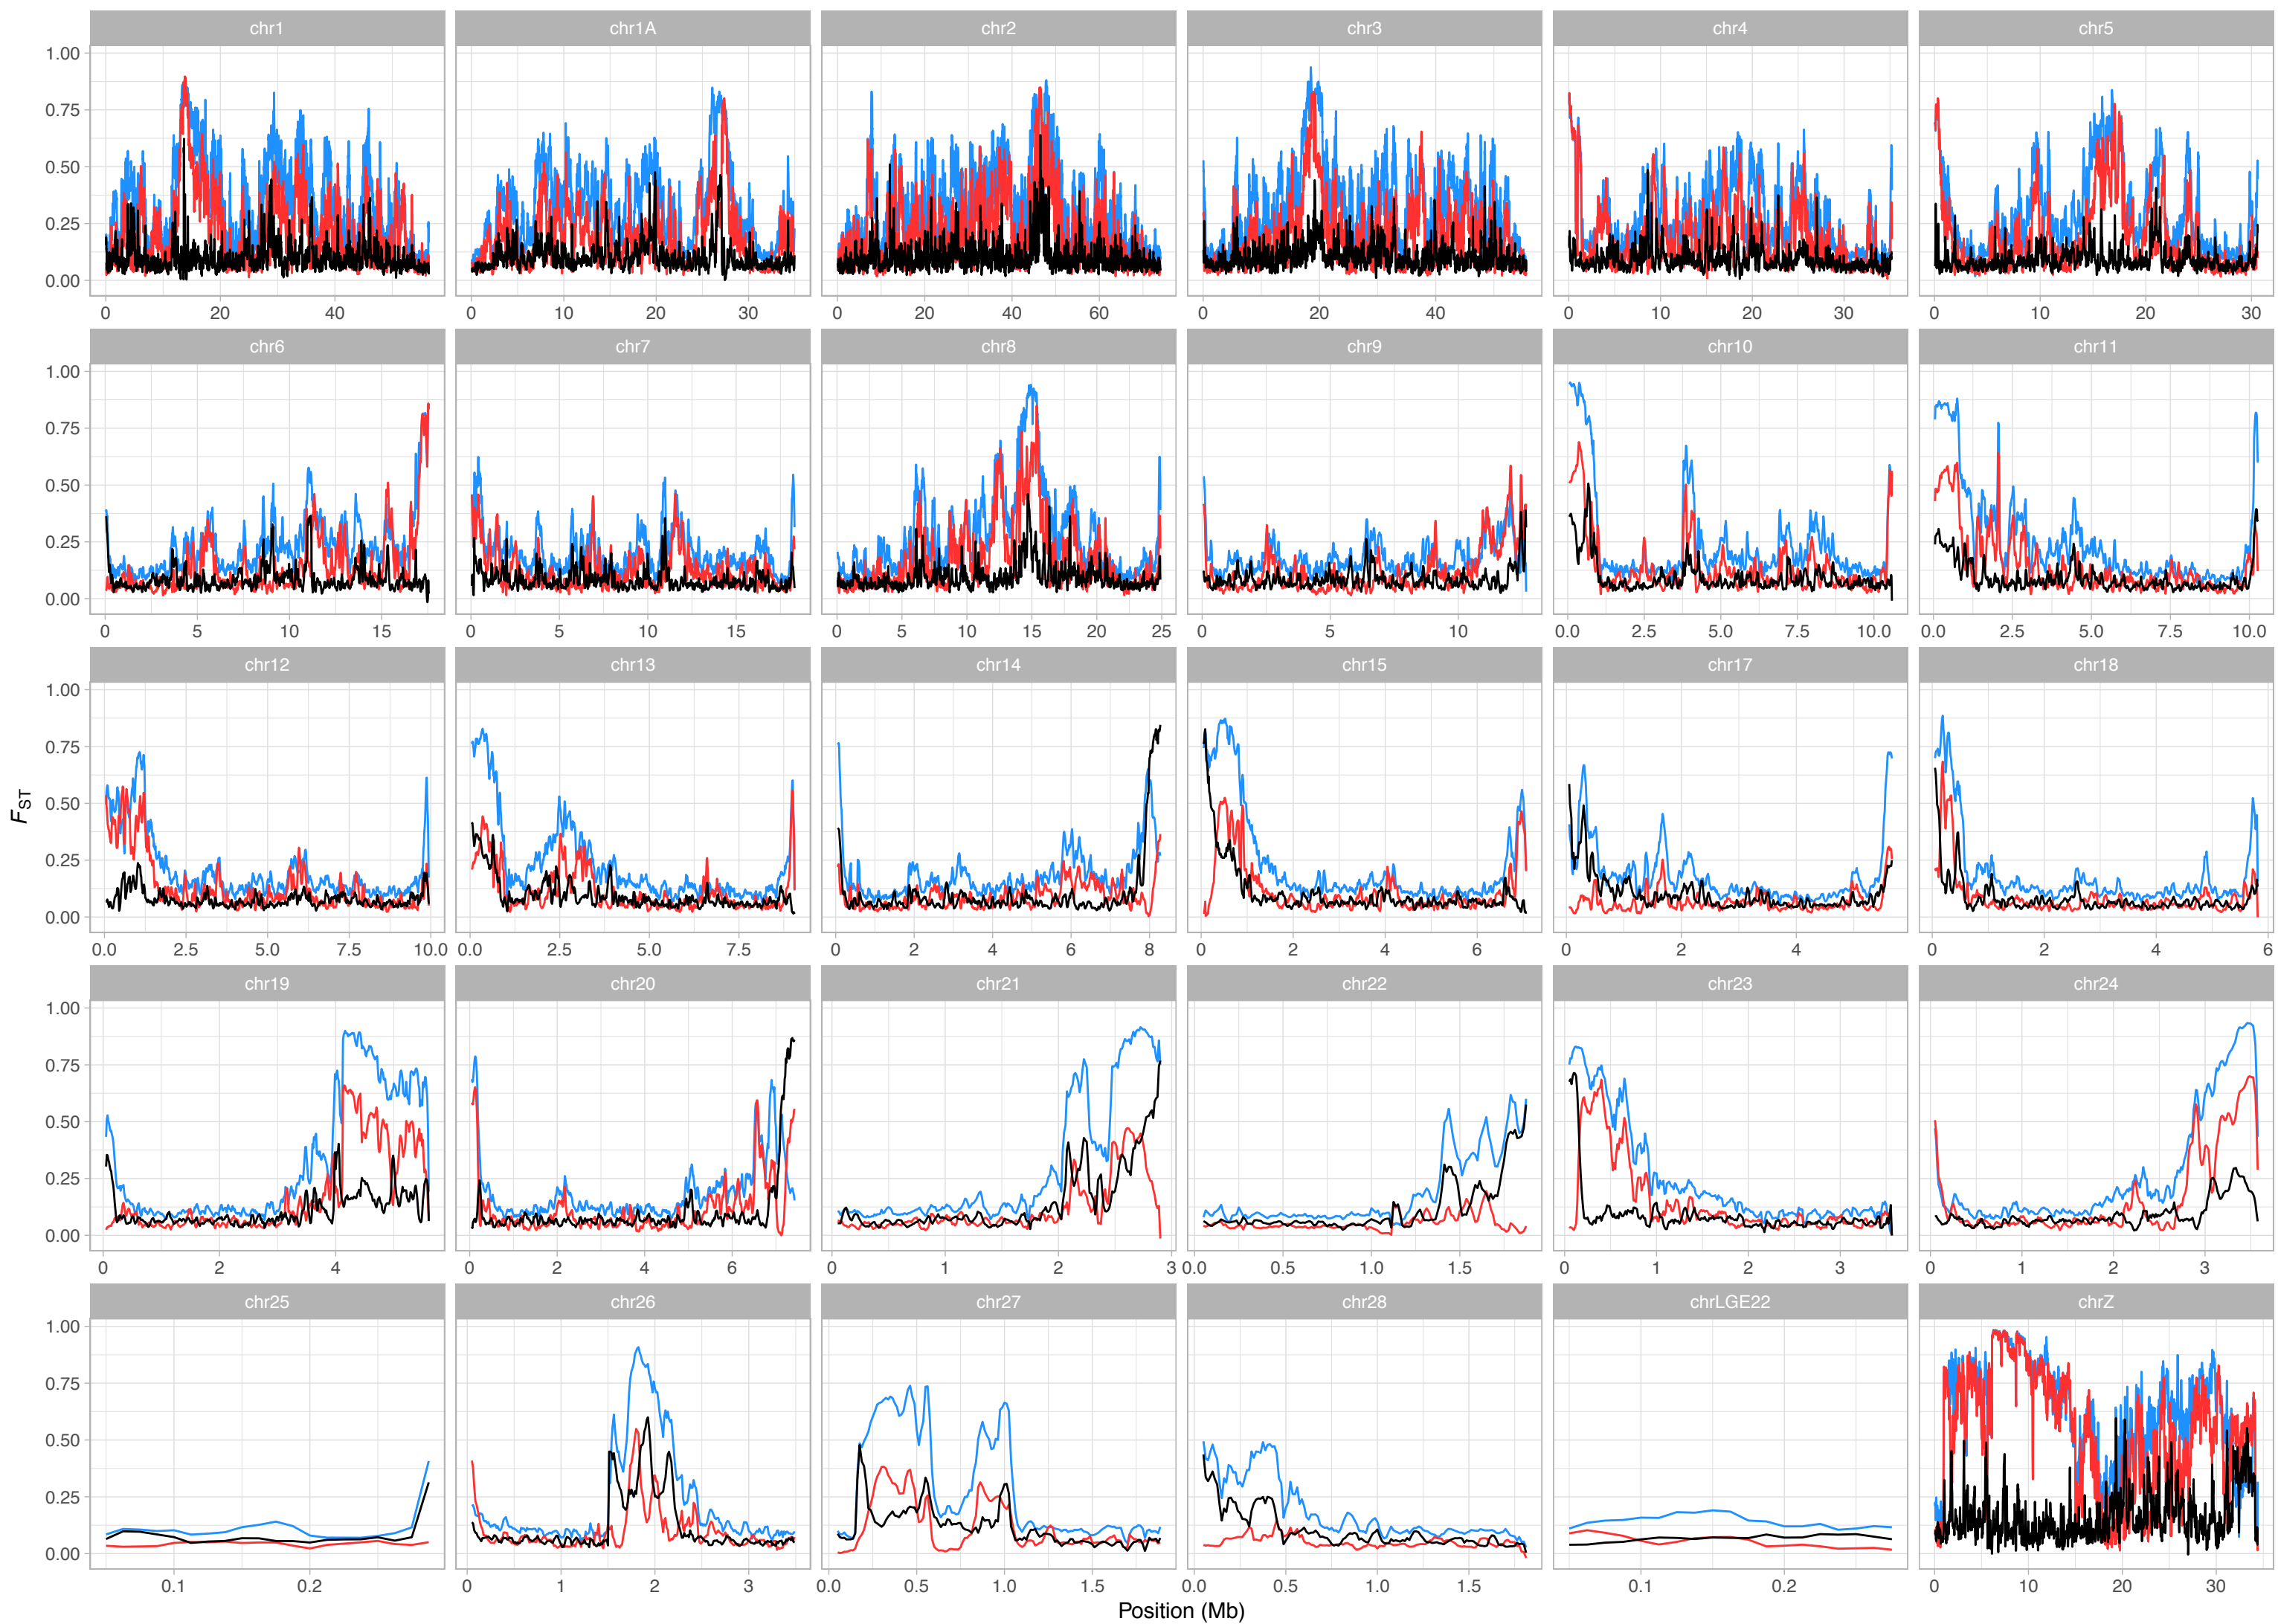

— spanish-bactrianus — house-spanish — house-bactrianus

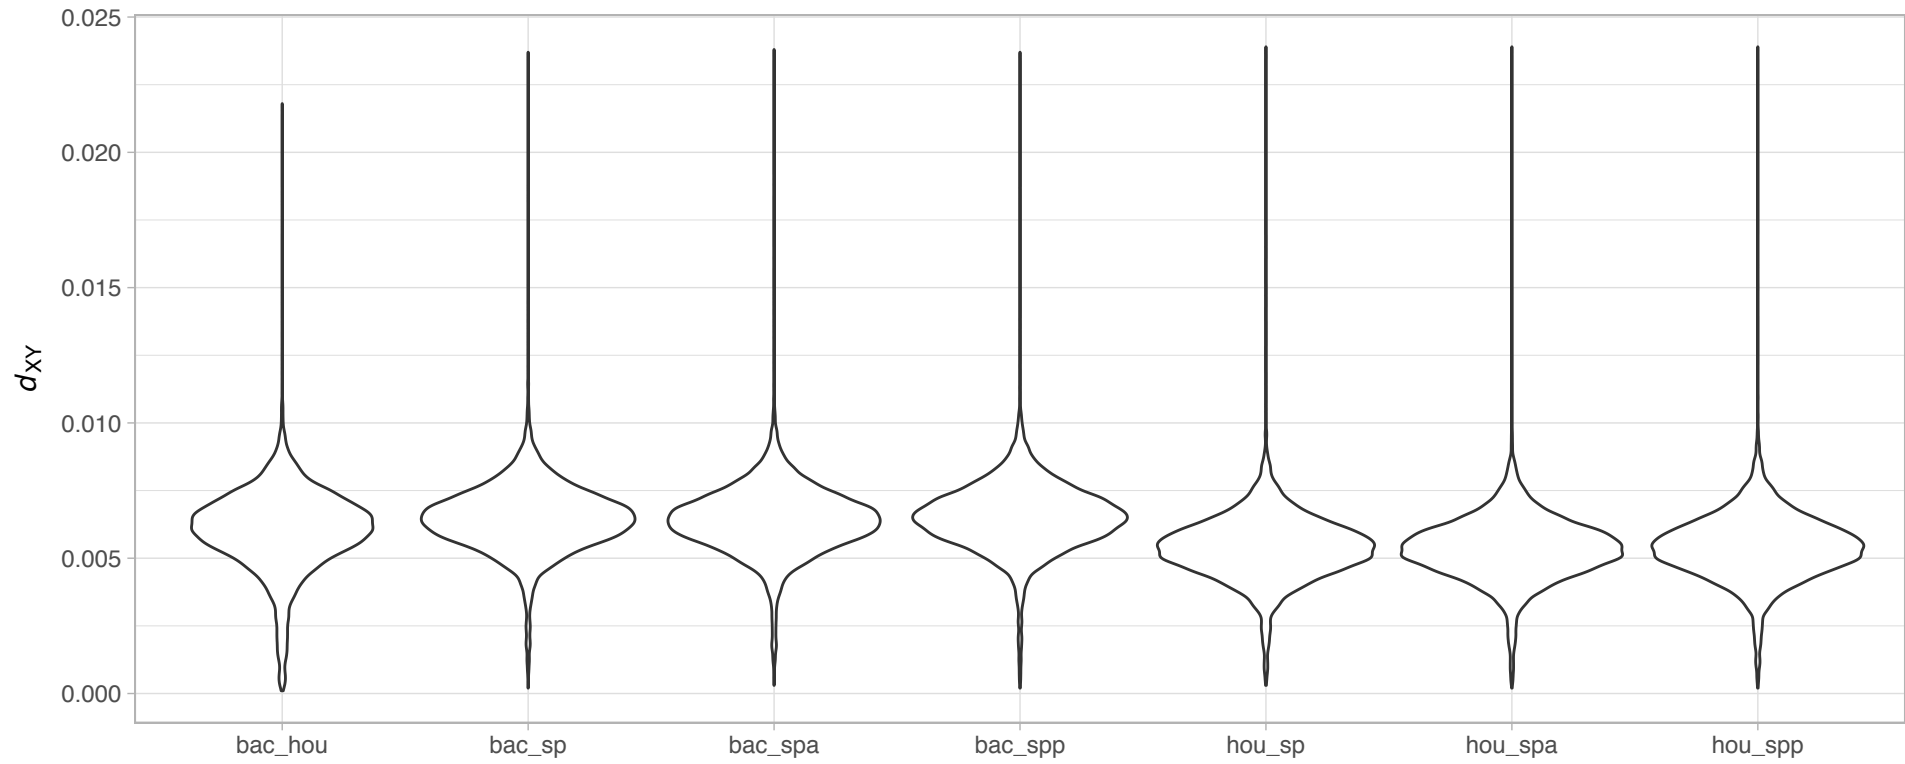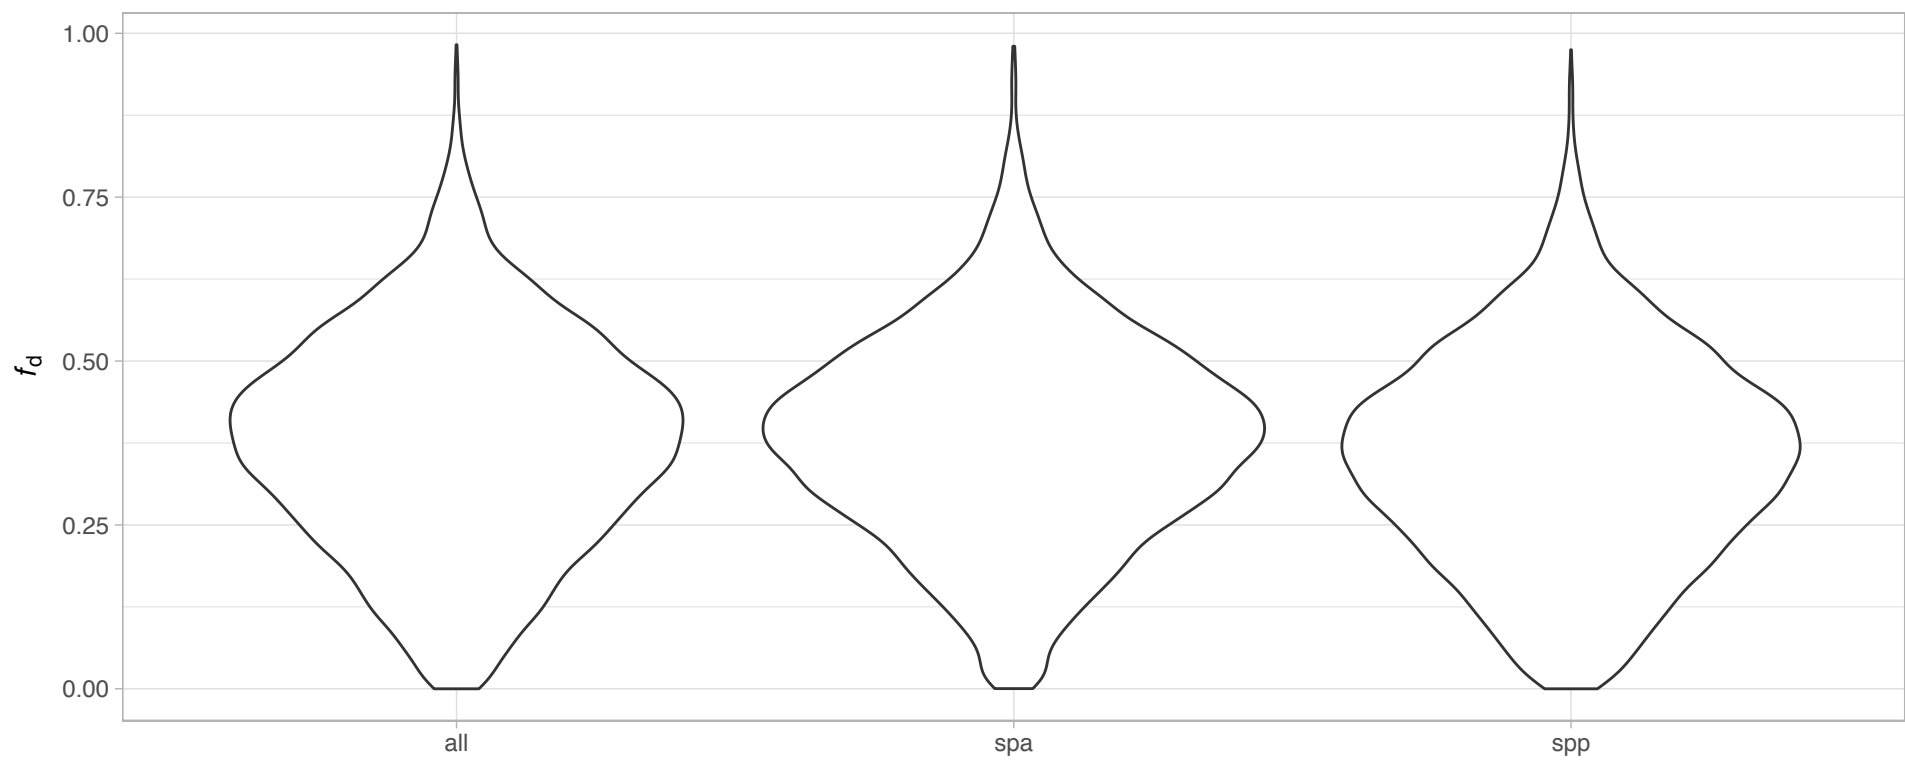

# Isolation

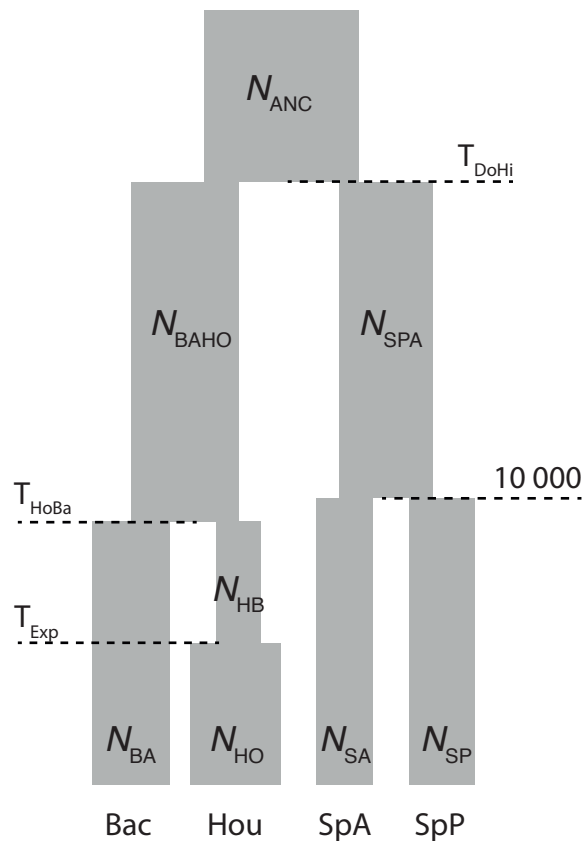

# Migration

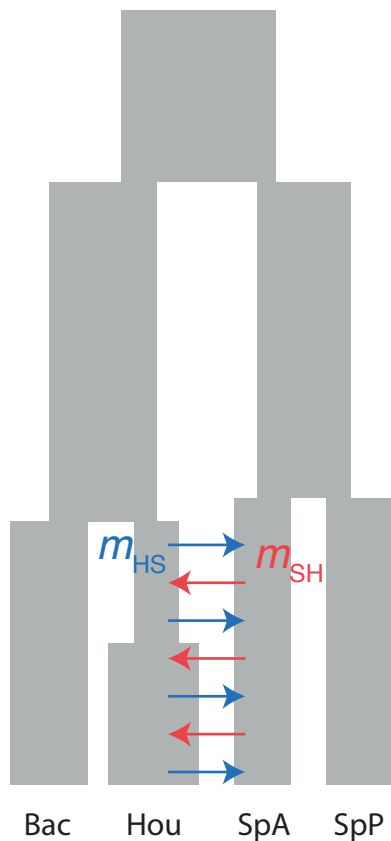

# Admixture

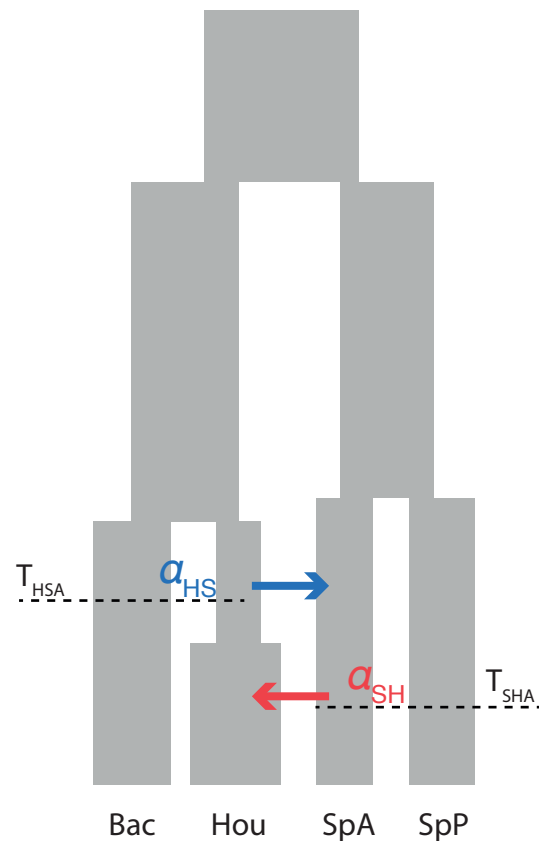

## Intraspecific migration parameters

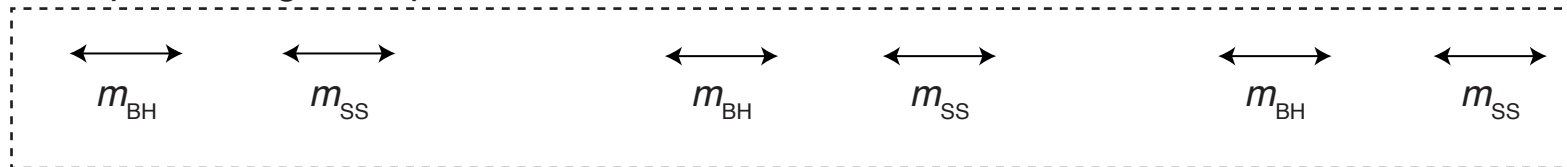



Log Likelihood

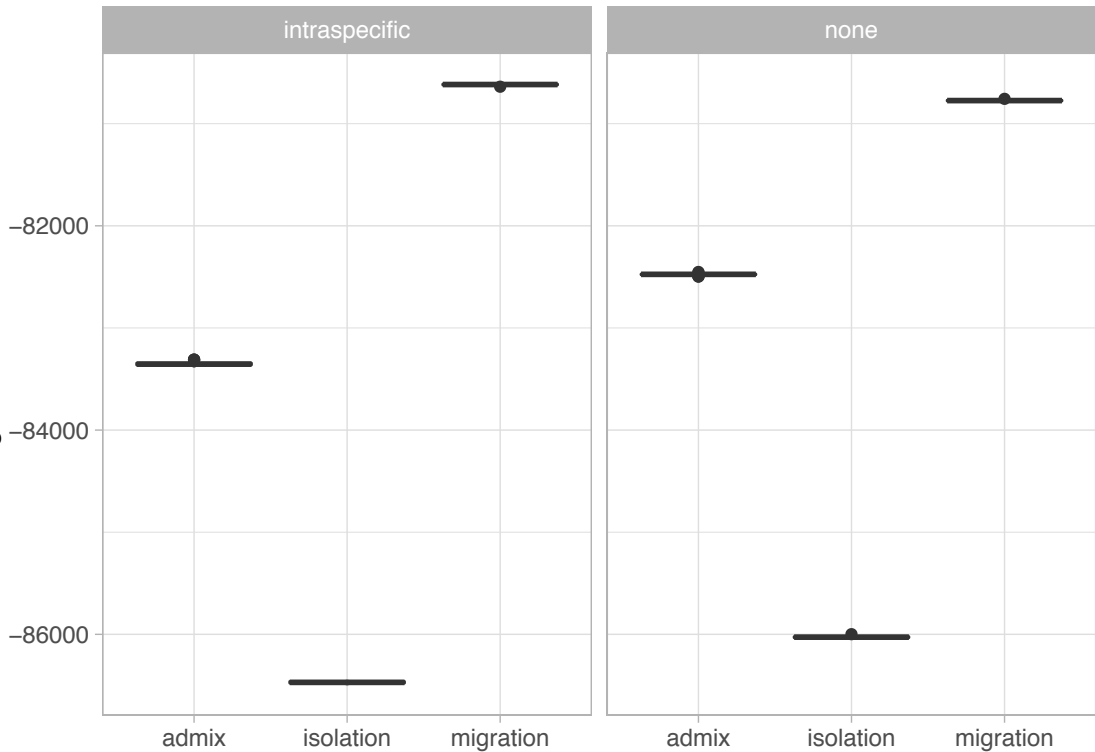

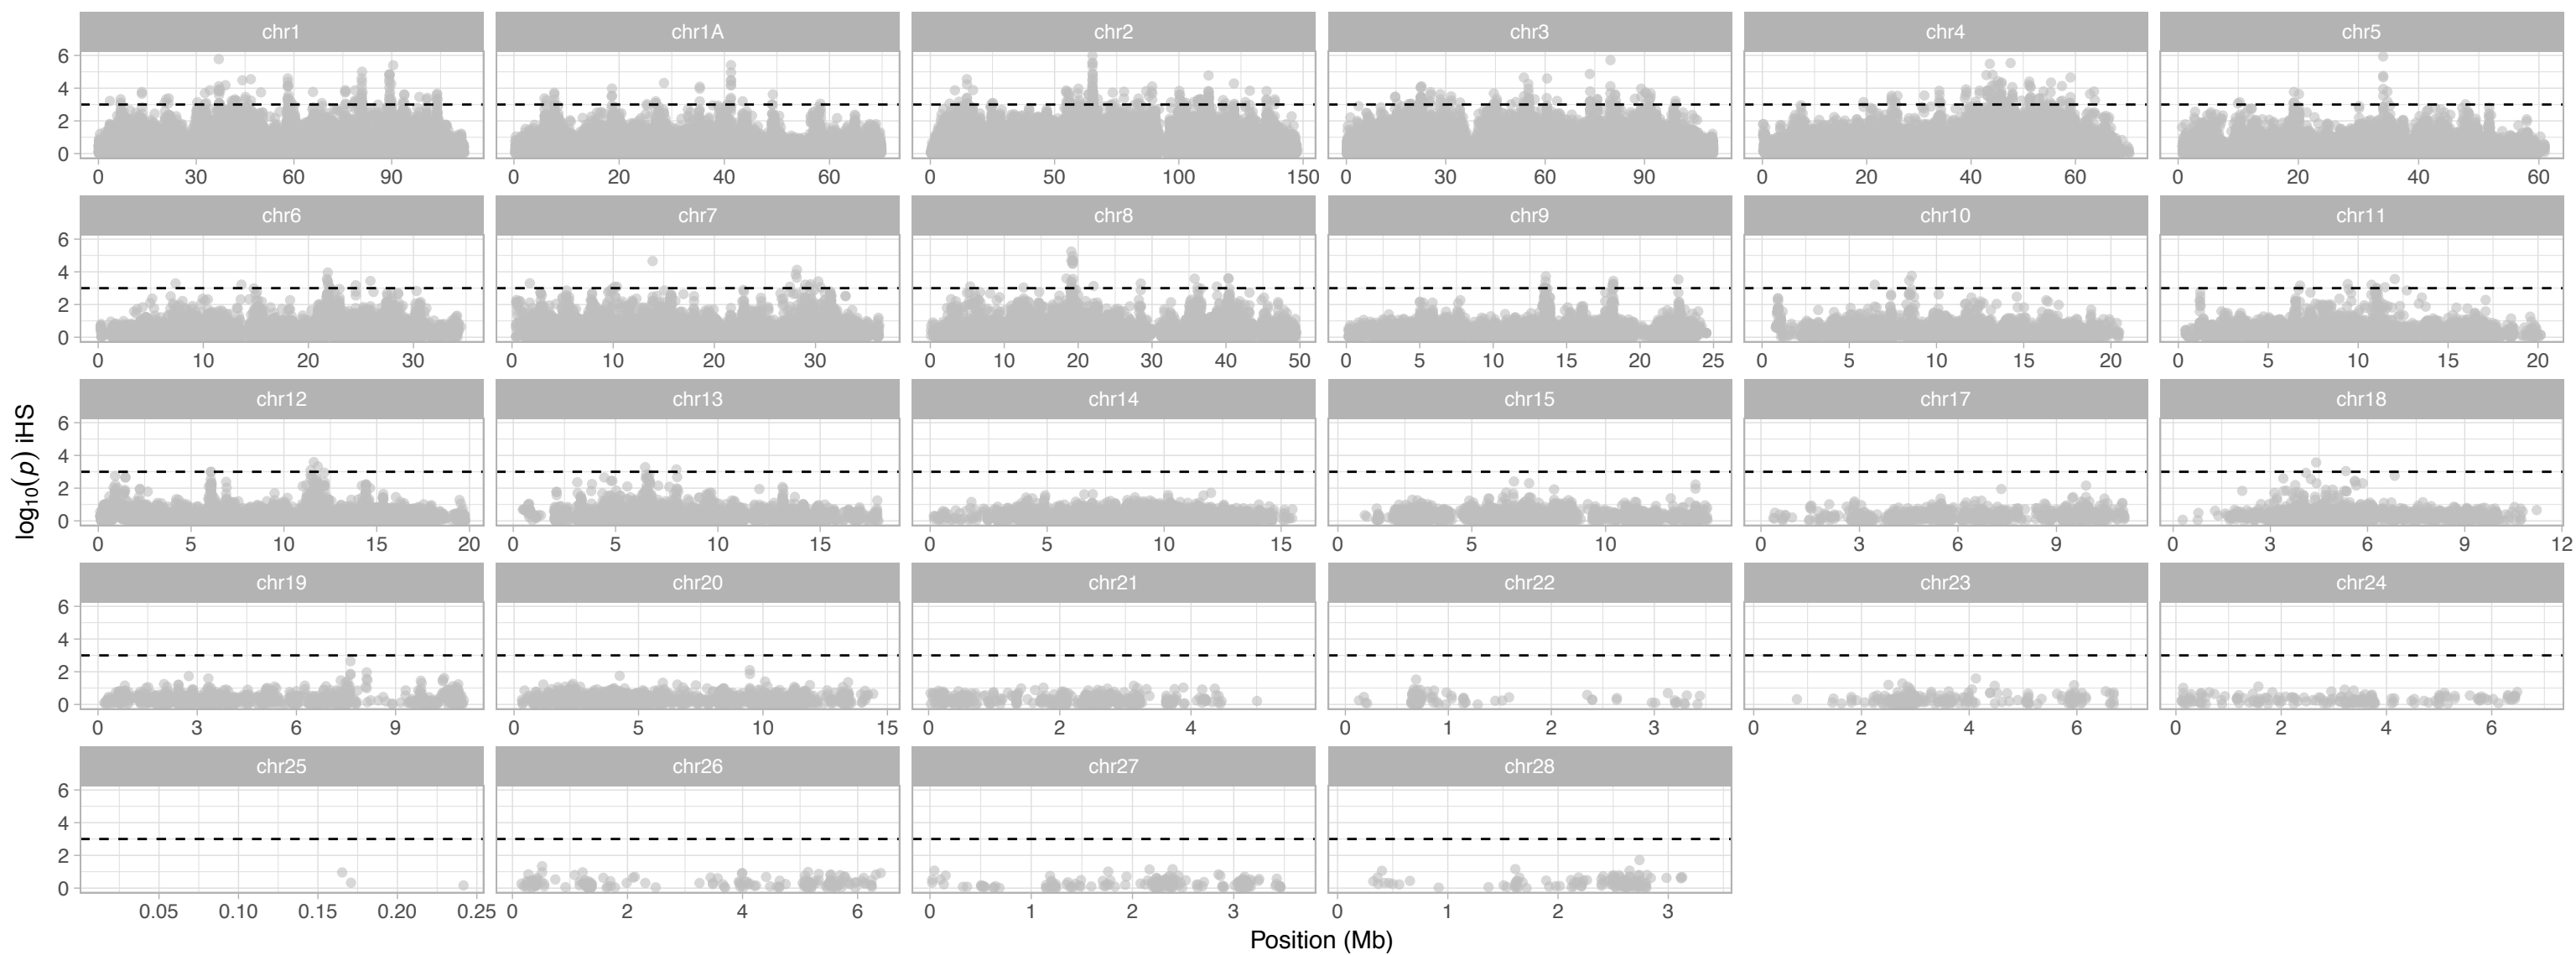

**Chromosome 1**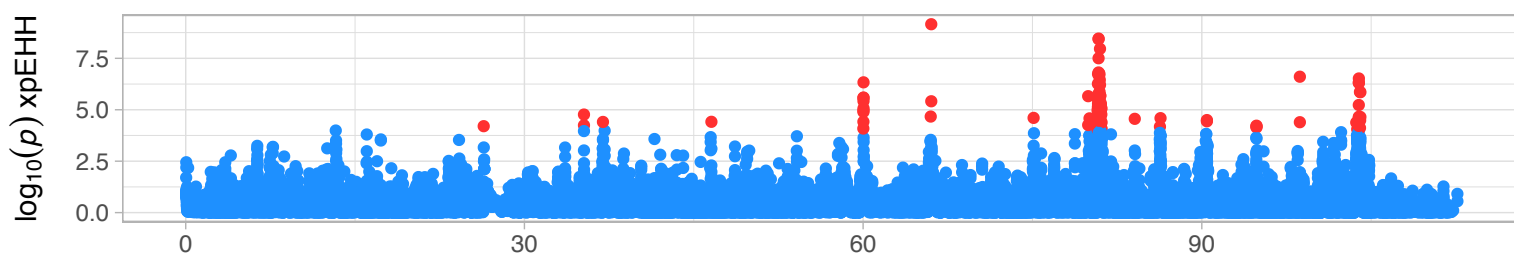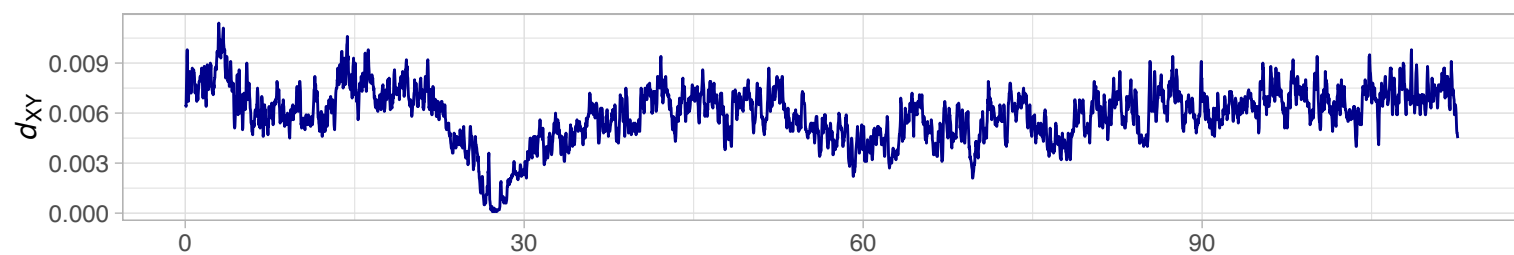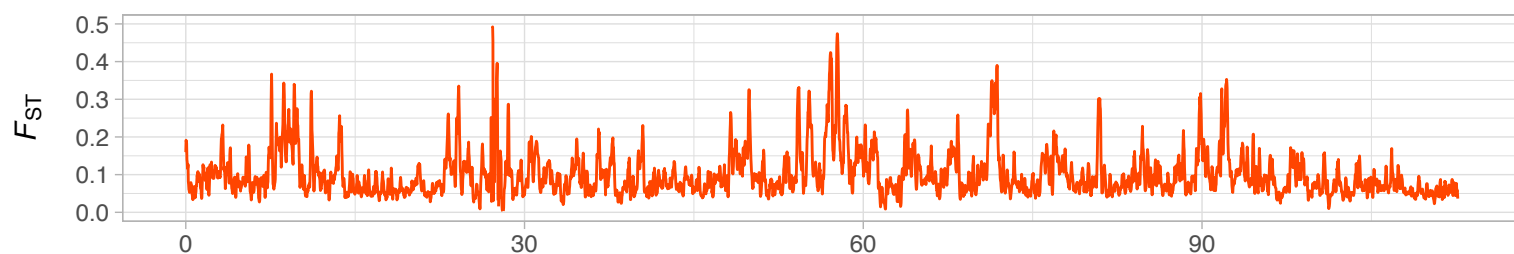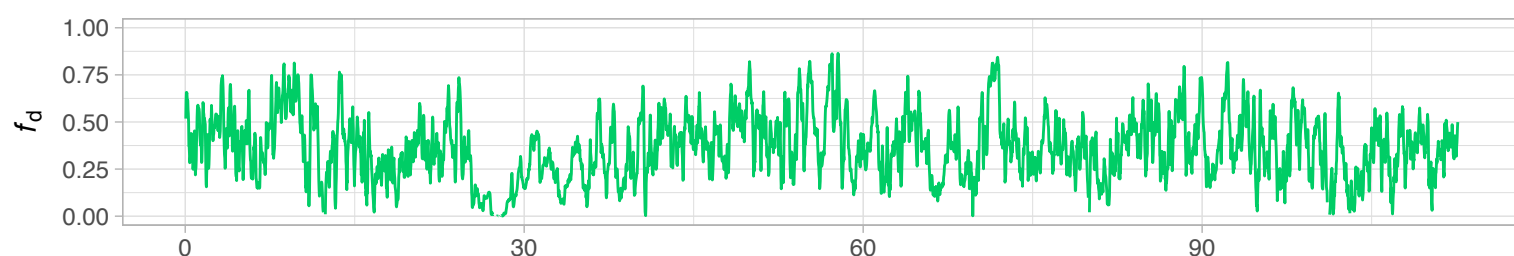

Position (Mb)

**Chromosome 2**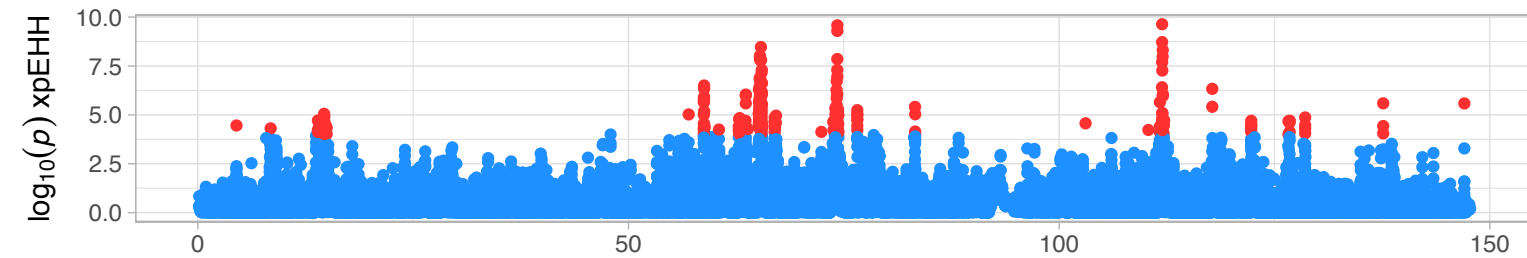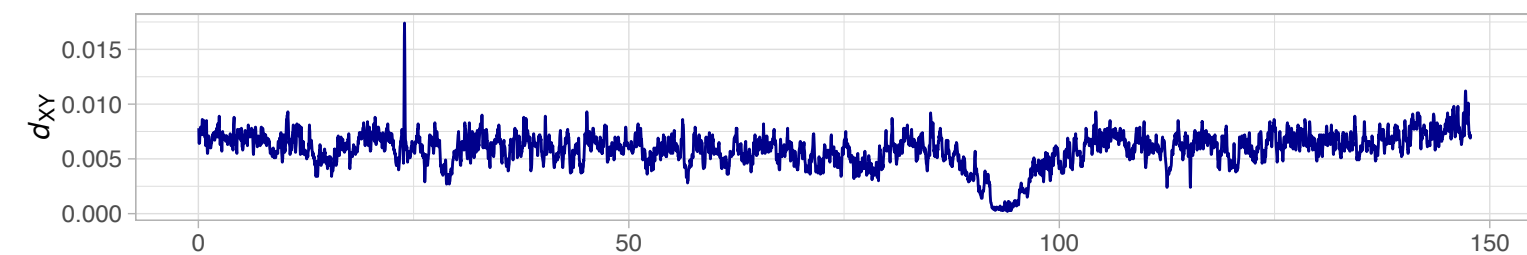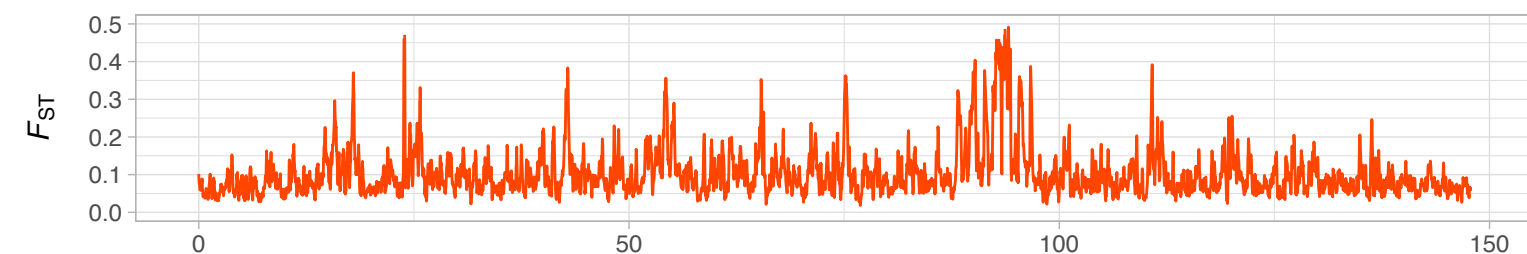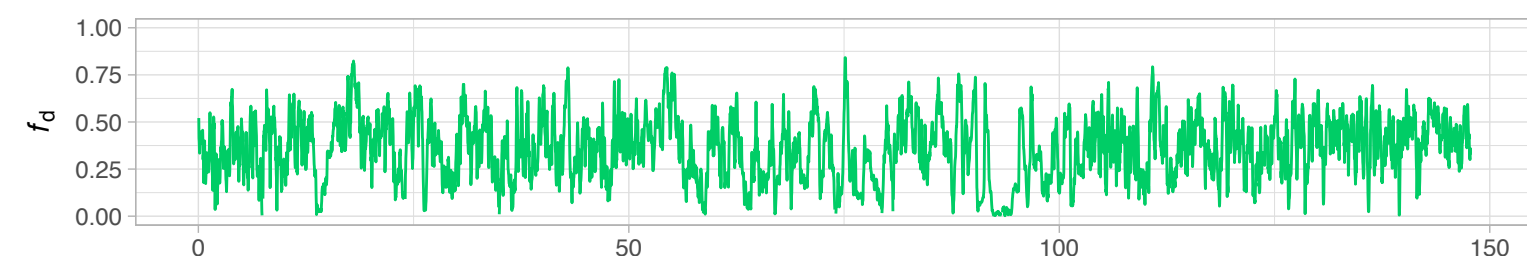

Position (Mb)

**Chromosome 3**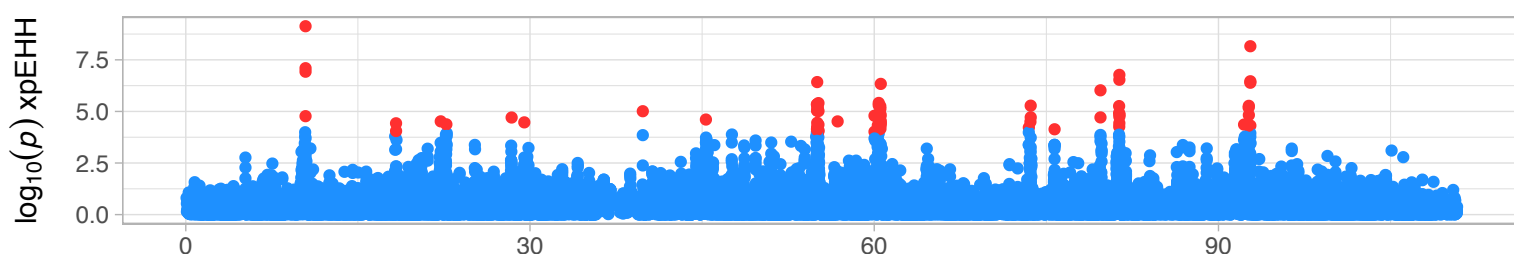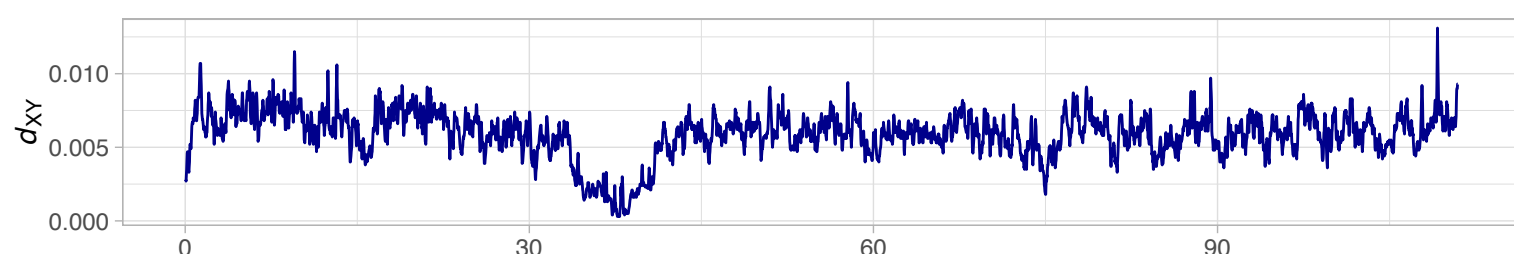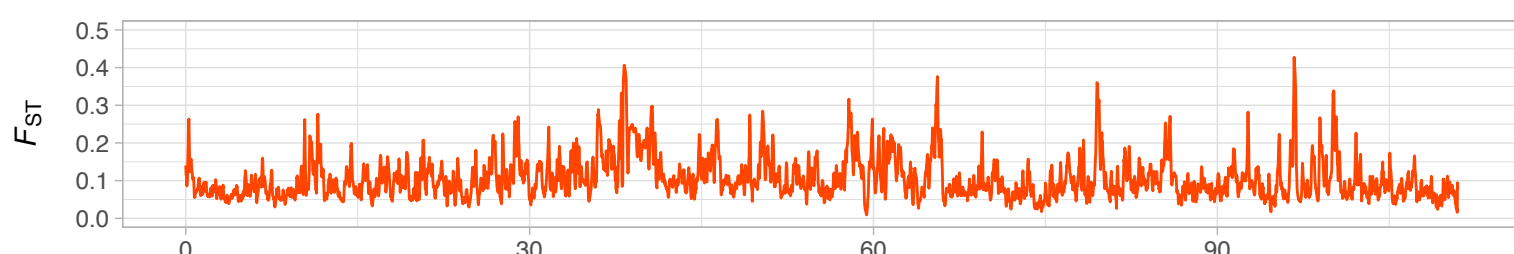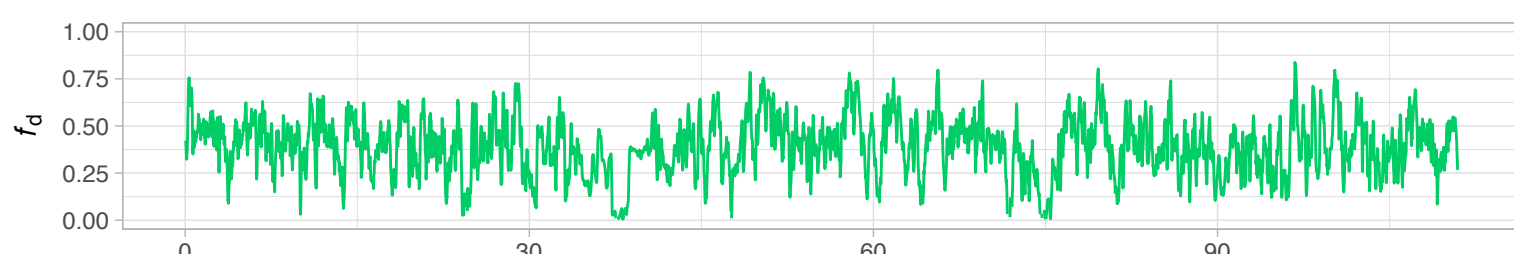

Position (Mb)

**Chromosome 8**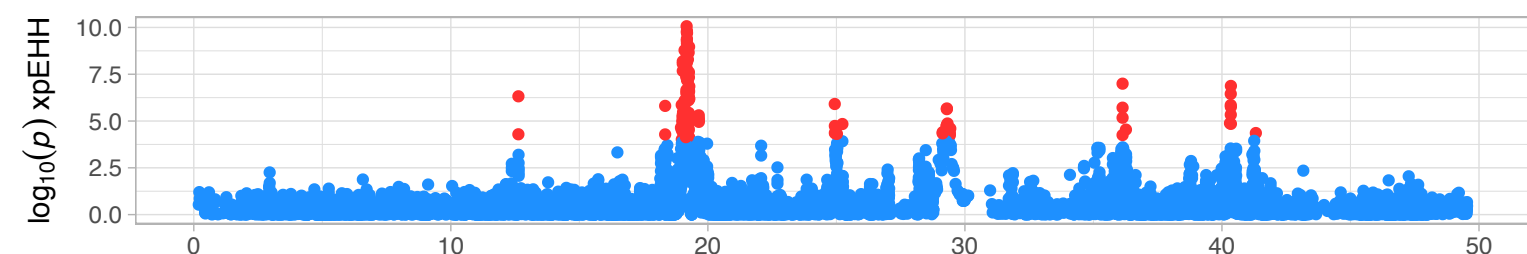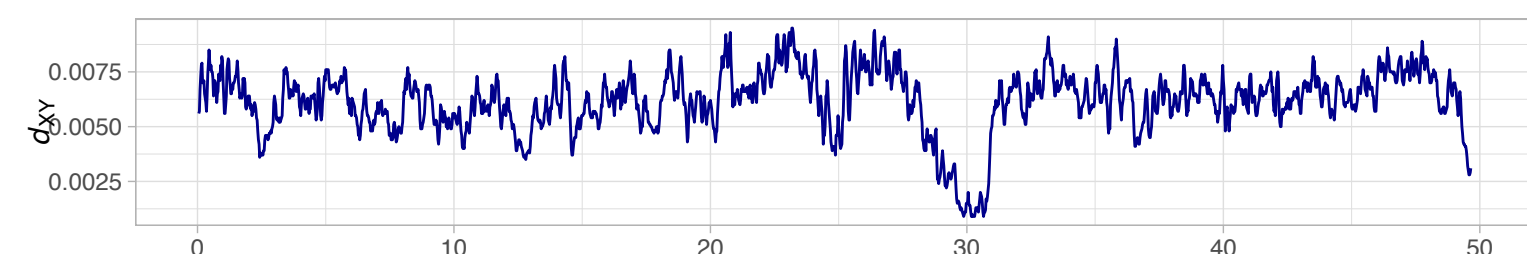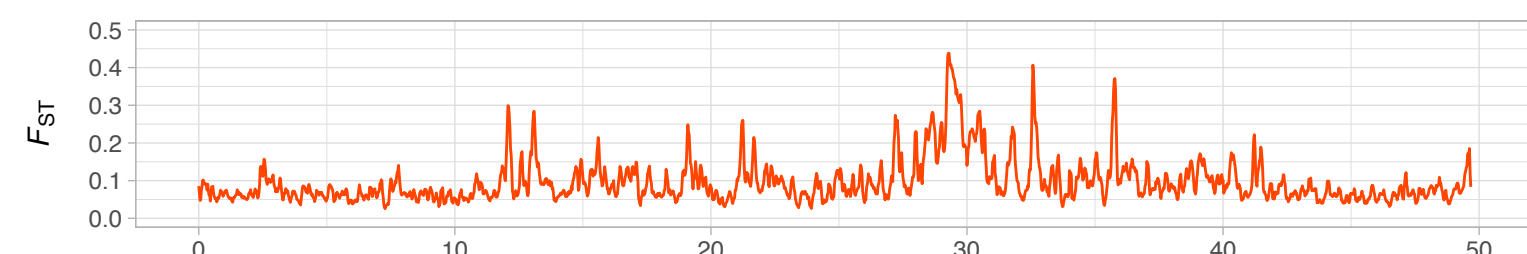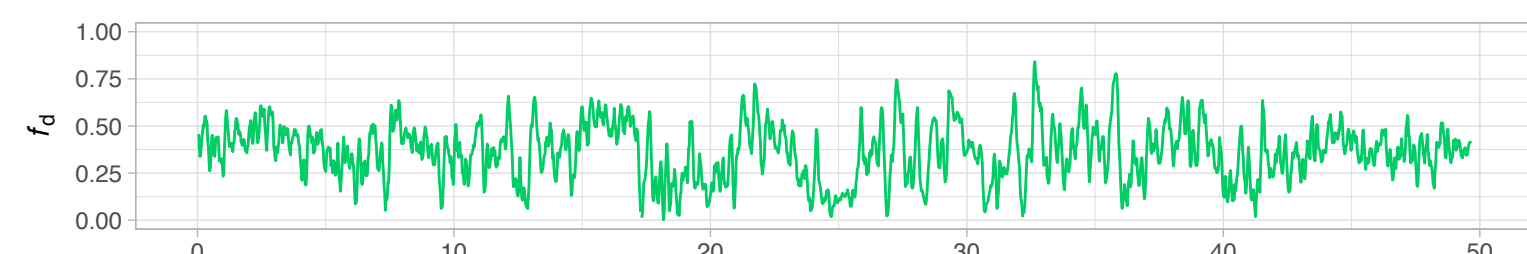

Position (Mb)

34 **Supplementary tables**

35

36 Table S1: Breakdown of samples used.

37 Table S2: Priors for demographic inference.

38 Table S3: Model selection for SFS based demographic analyses using scenarios with and  
39 without intraspecific gene flow.

40 Table S4: Number of xpEHH outlier peaks per chromosome.

41 Table S5: Table of highest xpEHH outlier peaks per chromosome.

42 Table S6: Enriched GO terms for genes within 250 Kb of xpEHH peaks between the  
43 house and Bactrianus sparrow.

44
